# Supplementary material for: Comprehensive pan-cancer analysis identifies H2AFX associated with poor prognosis in lung adenocarcinoma
Source: Research Square preprint supplement (doi:10.21203/rs.3.rs-8161785/v1), 2026-02-22
Supplement: Supplementary file 1 [file fc19e1498c5d257afac44fdd.docx]

Geethadevi, A., Nair, A., Parashar, D., Ku, Z., Xiong, W., Deng, H., Li, Y., George, J., McAllister, D. M., Sun, Y., Kadamberi, I. P., Gupta, P., Dwinell, M. B., Bradley, W. H., Rader, J. S., Rui, H., Schwabe, R. F., Zhang, N., Pradeep, S., … Chaluvally-Raghavan, P. (2021). Oncostatin M Receptor–Targeted Antibodies Suppress STAT3 Signaling and Inhibit Ovarian Cancer Growth. *Cancer Research*, *81*(20), 5336～5352. https://doi.org/10.1158/0008-5472.CAN-21-0483

Liao, Y., Ke, B., Long, X., Xu, J., & Wu, Y. (2023). Abnormalities in the SIRT1-SIRT3 axis promote myocardial ischemia-reperfusion injury through ferroptosis caused by silencing the PINK1/Parkin signaling pathway. *BMC Cardiovascular Disorders*, *23*(1), 582. https://doi.org/10.1186/s12872-023-03603-2

Lu, F., Wu, J., Zou, H., Yang, X., Wu, Y., & Xu, J. (2022). The Oncogenic and Immunological Roles of Apoptosis Antagonistic Transcription Factors in Human Tumors: A Pan-Cancer Analysis. *Oxidative Medicine and Cellular Longevity*, *2022*, 3355365. https://doi.org/10.1155/2022/3355365

Lu, F., Xin, Y., Xu, J.-J., Wu, Y.-B., Zhu, S.-Q., Zou, H.-P., Nie, R.-Z., Li, Z.-L., & Long, X. (2022). Minimally Invasive Myxoma Resection: A Single-Center 5 Years’ Experience. *The Heart Surgery Forum*, *25*(3), E353～E357. https://doi.org/10.1532/hsf.4689

Lu, F., Zhu, S.-Q., Long, X., Lin, K., Qiu, B.-Q., Pei, X., Xu, J.-J., & Wu, Y.-B. (2021). Clinical study of minimally invasive aortic valve replacement through a right parasternal second intercostal transverse incision: The first Chinese experience. *Asian Journal of Surgery*, *44*(8), 1063～1068. https://doi.org/10.1016/j.asjsur.2021.01.030

Pei, X., Chen, S.-W., Long, X., Zhu, S.-Q., Qiu, B.-Q., Lin, K., Lu, F., Xu, J.-J., Zhang, P.-F., & Wu, Y.-B. (2020). circMET promotes NSCLC cell proliferation, metastasis, and immune evasion by regulating the miR-145-5p/CXCL3 axis. *Aging*, *12*(13), 13038～13058. https://doi.org/10.18632/aging.103392

Pei, X., Zhu, S.-Q., Long, X., Qiu, B.-Q., Lin, K., Lu, F., Xu, J.-J., & Wu, Y.-B. (2020). Modified Distal Aortic Arch Occlusion During Aortic Arch Replacement. *Heart, Lung & Circulation*, *29*(9), e245～e252. https://doi.org/10.1016/j.hlc.2020.03.016

Qiu, B.-Q., Lin, X.-H., Lai, S.-Q., Lu, F., Lin, K., Long, X., Zhu, S.-Q., Zou, H.-X., Xu, J.-J., Liu, J.-C., & Wu, Y.-B. (2021). ITGB1-DT/ARNTL2 axis may be a novel biomarker in lung adenocarcinoma: A bioinformatics analysis and experimental validation. *Cancer Cell International*, *21*(1), 665. https://doi.org/10.1186/s12935-021-02380-2

Qiu, B.-Q., Lin, X.-H., Ye, X.-D., Huang, W., Pei, X., Xiong, D., Long, X., Zhu, S.-Q., Lu, F., Lin, K., Zhang, X.-Q., Xu, J.-J., Sheng, L.-L., Zhang, X.-M., Zhang, P.-F., & Wu, Y.-B. (2020). Long non-coding RNA PSMA3-AS1 promotes malignant phenotypes of esophageal cancer by modulating the miR-101/EZH2 axis as a ceRNA. *Aging*, *12*(2), 1843～1856. https://doi.org/10.18632/aging.102716

Wang, D.-G., Gao, J., Wang, J., Li, K.-C., Wu, Z.-B., Liao, Z.-M., & Wu, Y.-B. (2024). TFAP2A drives non-small cell lung cancer (NSCLC) progression and resistance to targeted therapy by facilitating the ESR2-mediated MAPK pathway. *Cell Death Discovery*, *10*(1), 491. https://doi.org/10.1038/s41420-024-02251-5

Wang, D.-G., Wang, J., Gao, J., Ao, Y.-Q., Long, X., Zhu, S.-Q., Zeng, Z.-H., Zhang, L.-X., Chen, S.-W., Pei, X., & Wu, Y.-B. (2025). Circ_0002638 drives squamous cell lung cancer (LUSC) progression and chemotherapy resistance by inhibiting ferroptosis via SENP1-mediated deSUMOylation of ACSL4. *Life Sciences*, *376*, 123728. https://doi.org/10.1016/j.lfs.2025.123728

Yang, J., Wang, J., Zeng, Z., Chen, Z., Wang, D., & Wu, Y. (2025). Injectable sustained-release danshensu sodium-loaded nanoparticle hydrogel targets macrophages to improve myocardial microenvironment for myocardial infarction treatment. *Bioactive Materials*, *54*, 159～178. https://doi.org/10.1016/j.bioactmat.2025.08.014

Ye, X.-D., Qiu, B.-Q., Xiong, D., Pei, X., Jie, N., Xu, H., Zhu, S.-Q., Long, X., Xu, Z., Wu, H.-B., Xu, J.-J., Huang, Y.-S., & Wu, Y.-B. (2020). High level of H3K4 tri-methylation modification predicts poor prognosis in esophageal cancer. *Journal of Cancer*, *11*(11), 3256～3263. https://doi.org/10.7150/jca.36801

Zhang, L., Wang, D., Zeng, L., Chen, S., Li, K., Yuan, T., Wang, J., Ma, X., Zhu, S., & Wu, Y. (2025). FHL2 facilitates LUSC growth and therapy resistance through PI3K/AKT/mTOR activation. *The Journal of Biological Chemistry*, *301*(7), 110332. https://doi.org/10.1016/j.jbc.2025.110332

Zhang, L.-X., Gao, J., Long, X., Zhang, P.-F., Yang, X., Zhu, S.-Q., Pei, X., Qiu, B.-Q., Chen, S.-W., Lu, F., Lin, K., Xu, J. J., & Wu, Y.-B. (2022). The circular RNA circHMGB2 drives immunosuppression and anti-PD-1 resistance in lung adenocarcinomas and squamous cell carcinomas via the miR-181a-5p/CARM1 axis. *Molecular Cancer*, *21*(1), 110. https://doi.org/10.1186/s12943-022-01586-w

Zhang, L.-X., Yang, X., Wu, Z.-B., Liao, Z.-M., Wang, D.-G., Chen, S.-W., Lu, F., Wu, Y.-B., & Zhu, S.-Q. (2023). TTI1 promotes non-small-cell lung cancer progression by regulating the mTOR signaling pathway. *Cancer Science*, *114*(3), 855～869. https://doi.org/10.1111/cas.15668
