# Supplementary figures and images for: Comprehensive pan-cancer analysis identifies H2AFX associated with poor prognosis in lung adenocarcinoma
Source: Research Square preprint supplement (doi:10.21203/rs.3.rs-8161785/v1), 2026-02-22

Figure 2A

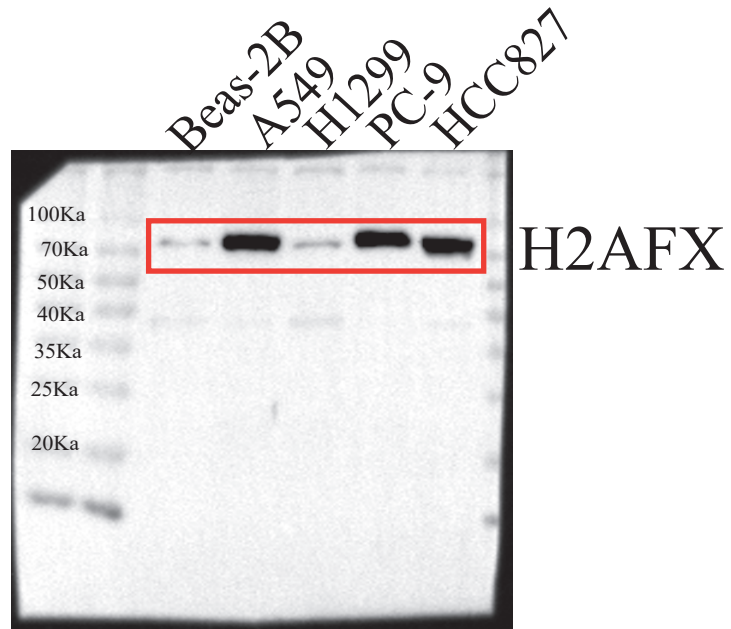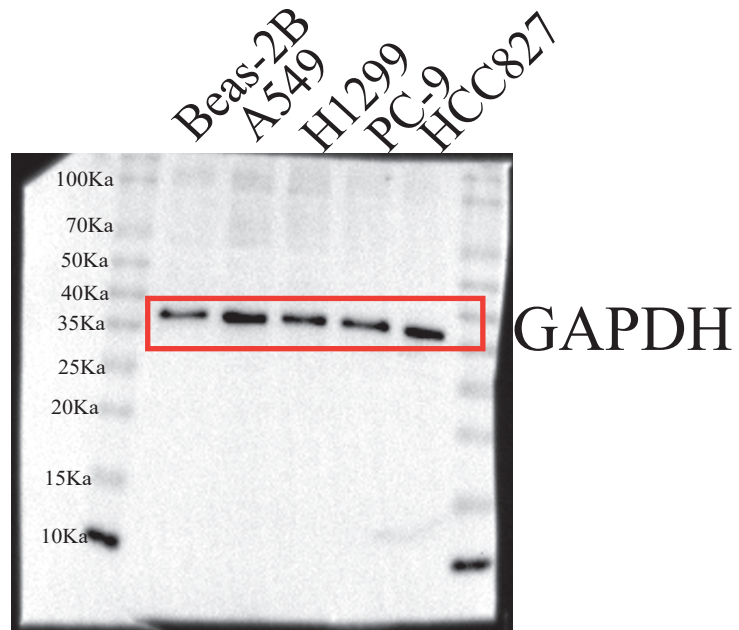

Supplement: Supplementary file 1 [file f1dd364677510a30b972ef87.pdf]
